# Supplementary material for: Bio-oil: a versatile precursor to produce carbon nanostructures in liquid phase under mild conditions
Source: Royal Society of Chemistry journal article supplement (doi:10.1039/c8nj05251d), 2019-01-01
Supplement: c8nj05251d1.pdf [file c8nj05251d1.pdf]

## Electronic supplementary information

### New Journal of Chemistry

#### Bio-oil: a versatile precursor to produce carbon nanostructures in liquid phase under mild conditions

Fabiane Carvalho Ballotin<sup>a</sup>, Lucas Theodoro Perdigão<sup>a</sup>, Marcus Vinícius B. Rezende<sup>a</sup>, Sugandha Dogra Pandey<sup>a</sup>, Márcio José da Silva<sup>b</sup>, Ricardo Reis Soares<sup>c</sup>, Jair Carlos Checon de Freitas<sup>d</sup>, Ana Paula de Carvalho Teixeira<sup>a</sup>, Rochel Montero Lago<sup>a\*</sup>

<sup>a</sup>Federal University of Minas Gerais (UFMG), Exact Science Institute, Chemistry Department, Belo Horizonte/ MG, 31270-901, Brazil.

<sup>b</sup>Federal University of Viçosa (UFV), Chemistry Department, Viçosa/MG, 36570-000, Brazil.

<sup>c</sup>Federal University of Uberlândia (UFU), Chemistry Engineer Department, 38408-102, Uberlândia, MG, Brazil.

<sup>d</sup>Laboratory of Carbon and Ceramic Materials, Department of Physics, Federal University of Espírito Santo, (UFES), 29075-910, Vitória, ES, Brazil.

\*Corresponding author

R. M. Lago, E-mail: rochel@ufmg.br

Table S1. CG/MS results for the organic phase (DCM) of the bio-oil sample

| Compounds                   | Area / % |
|-----------------------------|----------|
| Carbohydrates and derivates | 15       |
| Phenols                     | 17       |
| Furans                      | 4        |
| Guaiacols                   | 30       |
| Syringols                   | 50       |
| Hydrocarbons                | 0,5      |

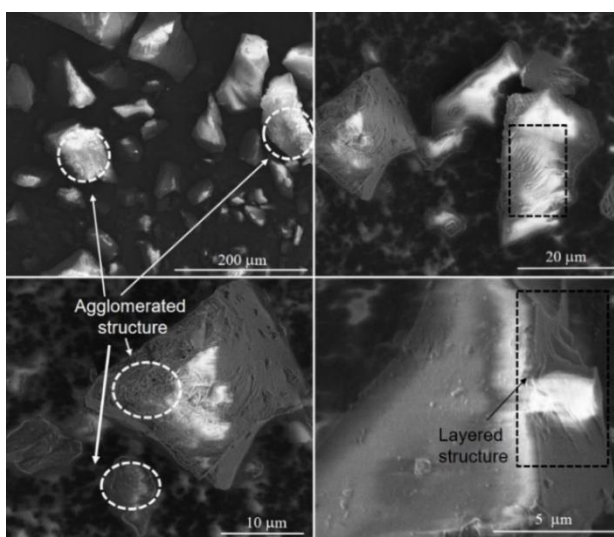

Fig S1. SEM images obtained for the product of the bio-oil reaction with H<sub>2</sub>SO<sub>4</sub> (BS<sub>1.8</sub>) at 120 °C.

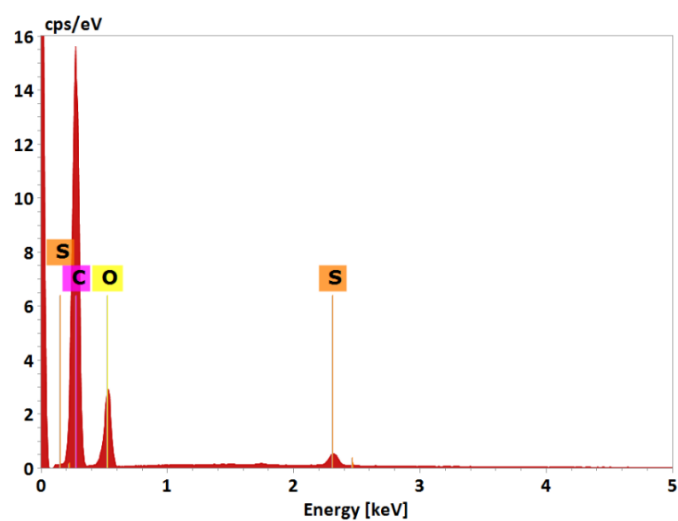

Fig S2. Energy dispersive X-ray spectrum obtained for the product of the bio-oil reaction with  $\text{H}_2\text{SO}_4$  (BS<sub>1.8</sub>) at 120 °C.

Table S2. Elemental analyses of materials BS<sub>1.8</sub>, BS<sub>3.7</sub>, BS<sub>9.2</sub> and BS<sub>18.4</sub>

| Materials          | % C  | % H | % S |
|--------------------|------|-----|-----|
| Bio-oil            | 45.5 | 6.6 |     |
| BS <sub>1.8</sub>  | 60.1 | 5.3 | 2.0 |
| BS <sub>3.7</sub>  | 55.0 | 4.1 | 2.8 |
| BS <sub>9.2</sub>  | 52.3 | 4.0 | 3.5 |
| BS <sub>18.4</sub> | 49.2 | 3.6 | 4.3 |

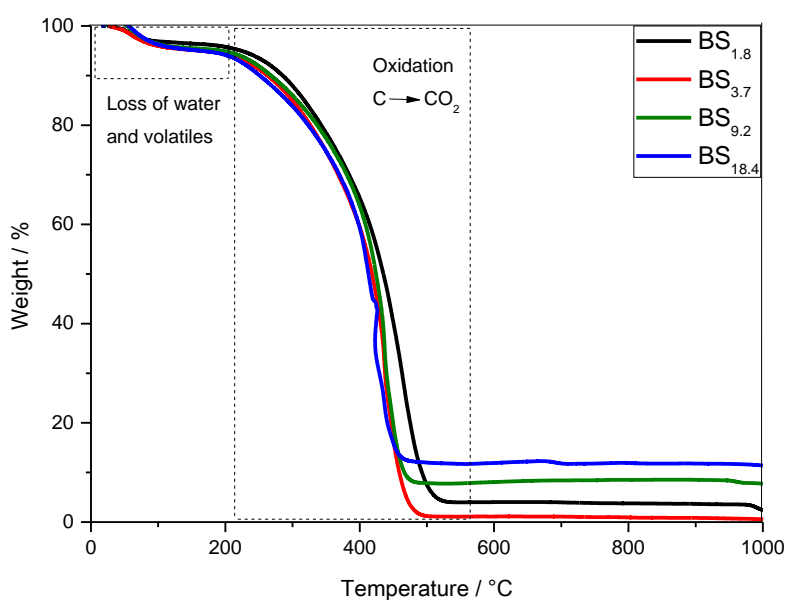

Fig S3. TG curves of materials BS<sub>1.8</sub>, BS<sub>3.7</sub>, BS<sub>9.2</sub> and BS<sub>18.4</sub>, recorded under air flow.

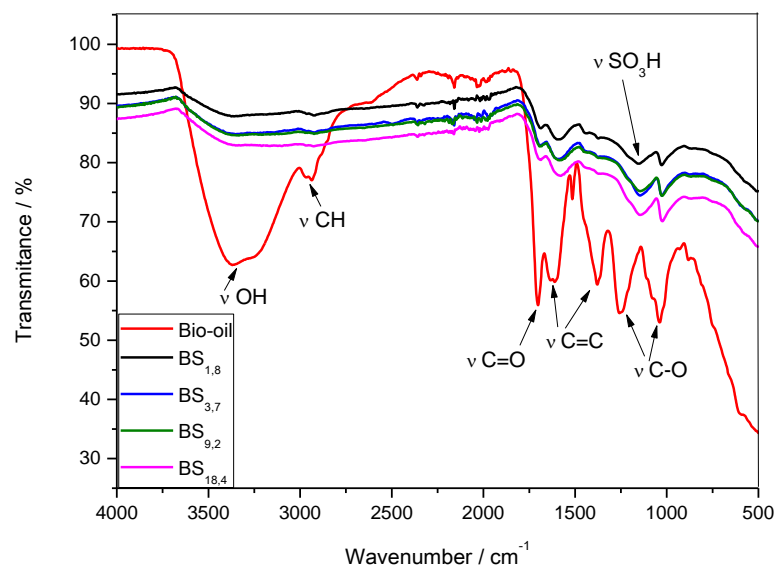

Fig S4. Infrared spectrum of bio-oil before and after sulfonation with different H<sub>2</sub>SO<sub>4</sub>:bio-oil ratio at 120°C for 2 hours.

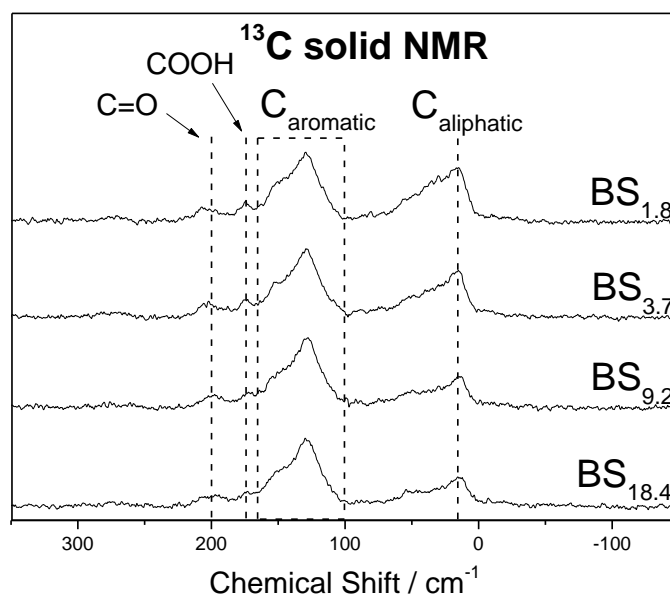

Fig S5. Solid-state <sup>13</sup>C NMR spectra and of samples BS<sub>1.8</sub>, BS<sub>3.7</sub>, BS<sub>9.2</sub>, BS<sub>18.4</sub> (CP/MAS spectra).

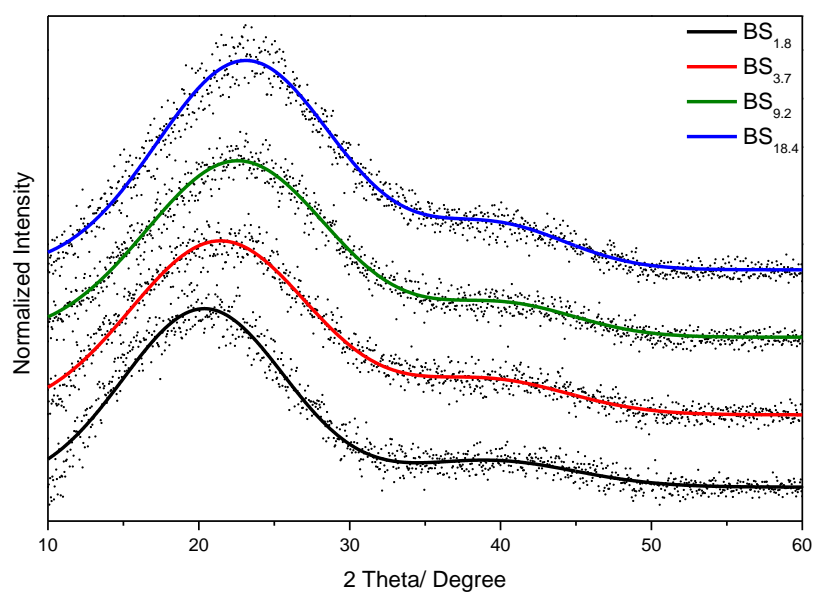

Fig S6. X-rays diffratograms of samples BS<sub>1.8</sub>, BS<sub>3.7</sub>, BS<sub>9.2</sub>, and BS<sub>18.4</sub>.

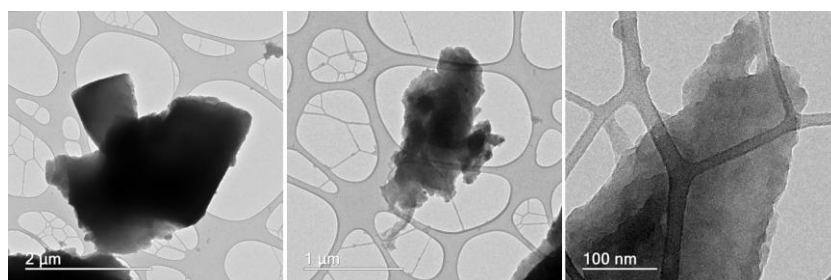

Fig S7. TEM images obtained of the sample BS<sub>9.2</sub> at 120 °C after 15 minutes of reaction.

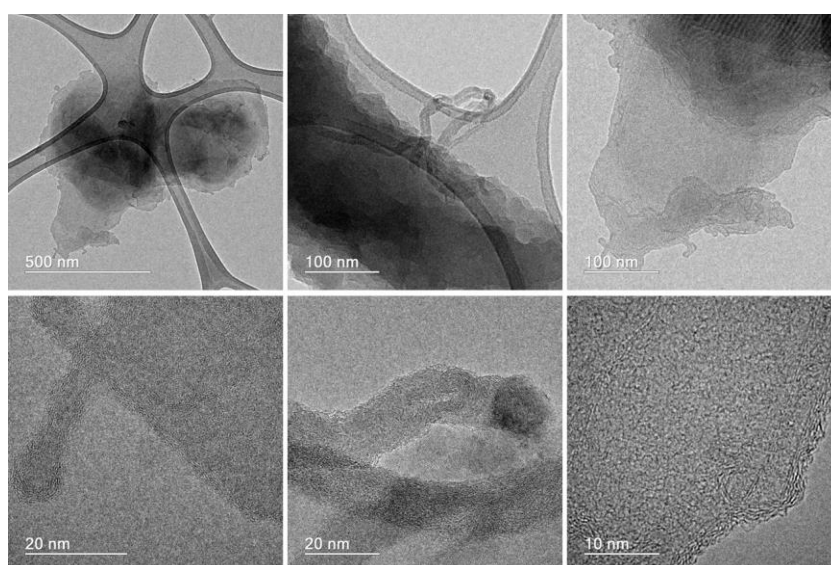

Fig S8. TEM images obtained of the sample BS<sub>9.2</sub> at 120 °C after 60 minutes of reaction.

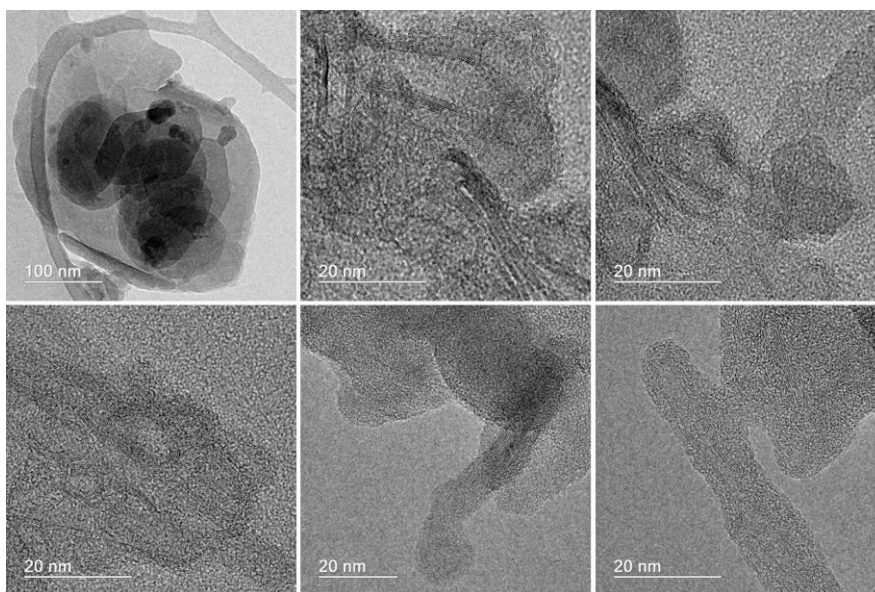

Fig S9. TEM images obtained of the sample BS<sub>9.2</sub> at 120 °C after 240 minutes of reaction.

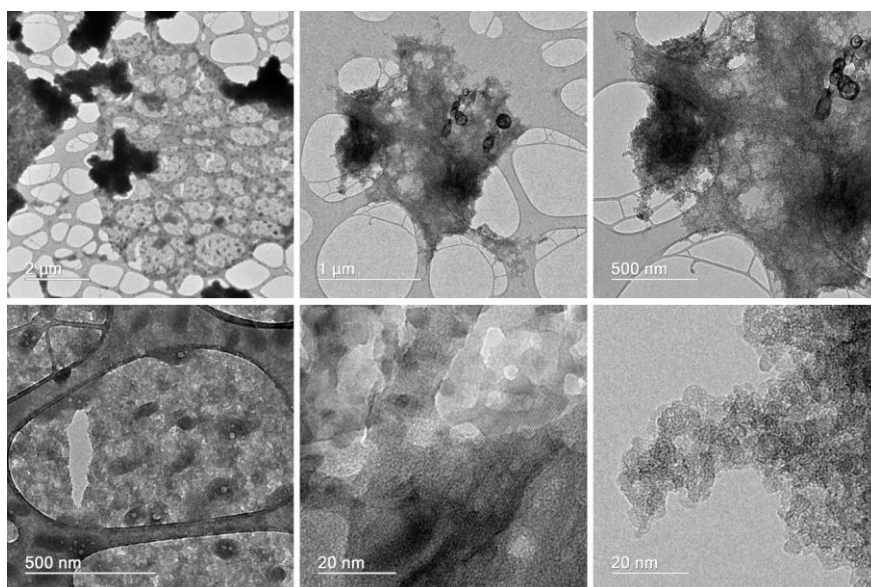

Fig S10. Transmission electron microscopy images obtained of the aqueous fraction after washing the materials.
